# Supplementary material for: Depression Risk Among Chinese Middle-Aged and Older Adults Based on CHARLS 2020 Survey Data
Source: Research Square preprint supplement (doi:10.21203/rs.3.rs-7354422/v1), 2025-10-06
Supplement: Supplementary file 1 [file 66eaac2997954bedc597726e.xlsx]

## Sheet: table1
	Table 1: Descriptive characteristics of the study population (n=15,935)
		n	%	Standard Deviation	Minimum	Maximum
	Gender
	Female	8257	51.82
	Male	7678	48.1832
	Age group
	45~59 years old	7585	47.5996
	60~74 years old	7072	44.3803
	75~89 years old	1267	7.95105
	90 years and above	11	0.0690304
	5 quintile of income
	Lowest-income group	4453	27.9448
	Lowest-middle-income group	2026	12.7142
	Middle-income group	2857	17.9291
	Upper-middle-income group	3279	20.5773
	High income group	3320	20.8346
	Region
	Northeast region	1067	6.69595
	Eastern region	4928	30.9256
	Central region	4689	29.4258
	Western region	5251	32.9526
	Marital Status
	Single	2232	14.01
	Married	1370	86
	Medical Insurance
	Enterprise employee medical insurance	2301	14.44
	Residential medical insurance	12793	80.28
	Not participating in medical insurance	671	4.21086
	Public medical care	170	1.07
	Highest Education(3 Catagory)
	Education-Primary and lower	9940	62.3784
	Education-Secondary school	5628	35.3185
	Education-Junior college and above	367	2.30311
	Hukou-Household register
	Rural	11786	73.93
	Urban	4149	26.04

## Sheet: table2
	Table 2: Distribution of depressive symptoms, health satisfaction, and self-rated health	Table #: Descriptive Statistics (N = 15935)	Table #: Descriptive Statistics (N = 15935)	Table #: Descriptive Statistics (N = 15935)	Table #: Descriptive Statistics (N = 15935)	Table #: Descriptive Statistics (N = 15935)
		n	%	Standard Deviation	Minimum	Maximum
	Psychological status
	Healthy	8757	54.95
	Depressed	7178	45.0455
	Life satisfaction
	Not at all satisfied	405	2.54158
	Somewhat dissatisfied	1284	8.05773
	Fairly satisfied	8570	53.781
	Very satisfied	4902	30.7625
	Extremely satisfied	774	4.85723
	Self-reported health status
	Very poor	1035	6.49514
	Poor	2797	17.5526
	Average	8088	50.7562
	Good	2038	12.7895
	Very good	1977	12.4067

## Sheet: table3
	Table 3: Behavioral Characteristics of the Study Population	Table #: Descriptive Statistics (N = 15935)	Table #: Descriptive Statistics (N = 15935)	Table #: Descriptive Statistics (N = 15935)
		n	%	Standard Deviation
	Sleep duration (in minutes)		403.5	124.5
	Physical exercise
	Did not engage in physical exercise	8755	54.942
	Mild physical exercise	6310	39.5984
	Moderate physical exercise	624	3.91591
	Severe physical exercise	246	1.54377
	Smoking status
	Non-smoking	11724	73.57
	Smoking	4211	26.43
	Alcohol consumption status
	Does not drink alcohol	9933	62.3345
	Drinks alcohol - less than once a month	1581	9.92156
	Drinks alcohol - more than once a month	4421	27.744
	Drinking frequency
	Drinking frequency - Never	9933	62.3345
	Drinking frequency - Less than once a month	1581	9.92156
	Drinking frequency - Once a month	362	2.27173
	Drinking frequency - 2-3 times a month	859	5.39065
	Drinking frequency - Once a week	451	2.83025
	Drinking frequency - 2-3 times a week	614	3.85315
	Drinking frequency - 4-6 times a week	202	1.26765
	Drinking frequency - Once a day	1129	7.08503
	Drinking frequency - Twice a day	628	3.94101
	Drinking frequency - More than twice a day	176	1.10449
	Participate in social activities with friends and relatives
	No	9664	60.65
	Yes	6271	39.3536
	Participates in recreational and leisure social activities
	No	12530	78.63
	Yes	3405	21.37
	Participates in community activities
	No	15510	97.33
	Yes	425	2.66709
	Participates in volunteer/charity activities
	No	15392	96.59
	Yes	540	3.40759
	Participates in school/training activities
	No	15658	98.26
	Yes	277	1.73831
	Internet usage status
	Non-Internet users	8935	56.07
	Internet users	7000	43.49
	Internet use - Chatting
	Does not chat online	2900	18.2
	Chats online	4100	25.73
	Internet use - Reading news
	Does not browse news online	2067	12.97
	Browses news online	4933	30.96
	Internet use - Watching videos
	Does not watch videos online	1782	11.18
	Watches videos online	5218	32.75
	Internet use - Plays games
	Does not play games online	6182	38.8
	Plays games online	818	5.13
	WeChat usage
	Does not use WeChat	625	3.92218
	Uses WeChat	6375	40.0063
	WeChat Moments posting
	Does not use WeChat	625	3.92218
	Does not post on WeChat Moments	2608	16.37
	Posts on WeChat Moments	3767	23.64
	Days spent living without a partner or others due to the pandemic		6.92816	28.9373

## Sheet: table4
		Table 4: Gender-stratified comparisons of depression prevalence	Table #: Descriptive Statistics (N = 15935)	Table #: Descriptive Statistics (N = 15935)		Table #: Descriptive Statistics (N = 15935)
			Healthy	Depression
			n	n	%	P-value
		Total
			8575	7178	45.05
		Gender
		Female	3910	4347	52.65	＜0.001
		Male	4847	2831	36.87
		Age group
		45~59 years old	4241	3371	44.44	0.008
		60~74 years old	3804	3268	46.21
		75~89 years old	730	537	42.38
		90 years and above	9	2	18.18
		5 quintile of income
		Lowest-income group	2298	2155	48.39	＜0.001
		Lowest-middle-income group	950	1076	53.11
		Middle-income group	1427	1430	50.05
		Upper-middle-income group	1857	1422	43.37
		High income group	2225	1095	32.98
		Region
		Northeast region	597	470	44.05	＜0.001
		Eastern region	3034	1894	38.43
		Central region	2400	2289	48.82
		Western region	2726	2525	48.09
		Marital Status
		Single	1051	1181	52.91	＜0.001
		Married	7706	5997	43.76
		Medical Insurance
		Not participating in medical insurance	352	319	47.54	＜0.001
		Residential medical insurance	6829	5969	46.62
		Enterprise employee medical insurance	1451	850	36.94
		Public medical care	125	45	26.47
		Highest Education(3 Catagory)
		Education-Primary and lower	5164	4776	48.05	＜0.001
		Education-Secondary school	3360	2268	40.3
		Education-Junior college and above	233	134	36.51
		Hukou-Household register
		Rural	6266	5520	46.84	＜0.001
		Urban	2491	1658	39.96
		Physical exercise
		Did not engage in physical exercise	4779	3976	45.41	0.274
		Mild physical exercise	3513	2797	44.33
		Moderate physical exercise	326	298	47.76
		Severe physical exercise	139	107	43.5
		Smoking status
		Non-smoking	6156	5568	47.49	＜0.001
		Smoking	2601	1610	38.23
		Alcohol consumption status
		Does not drink alcohol	5136	4797	48.29	＜0.001
		Drinks alcohol - less than once a month	861	720	45.54
		Drinks alcohol - more than once a month	2760	1661	37.57
		Participate in social activities with friends and relatives
		No	5388	4276	44.25	＜0.001
		Yes	3369	2902	46.28
		Participates in recreational and leisure social activities
		No	6809	5721	45.66	＜0.001
		Yes	1948	1457	42.79
		Participates in community activities
		No	8506	7004	45.16	0.085
		Yes	251	174	40.94
		Participates in volunteer/charity activities
		No	8464	6928	45.01	0.635
		Yes	293	250	46.04
		Participates in school/training activities
		No	8602	7056	45.06	0.735
		Yes	155	122	44.04
		Internet usage status
		Does not use Internet	4749	4186	46.85	＜0.001
		Internet users	4008	2992	42.74
		WeChat usage
		Does not use WeChat	329	296	47.36	＜0.001
		Uses WeChat	3679	2696	42.29
		WeChat Moments posting
		Does not post on WeChat Moments	1459	1149	44.06	＜0.001
		Posts on WeChat Moments	2220	1547	41.07
		Sleep duration (in minutes)	422.5±117.0	380.3±129.0		＜0.001*
		Insufficient Sleep ( if sleep time＜420min)	4884	4951	50.34	＜0.001
		Adequate Sleep ( if sleep time＞420min)	3873	2227	36.51
		*t-test

## Sheet: table5
	Table 5: Adjusted odds ratios from multivariable logistic regression models
	Depression
		Adjusted Odds Ratio	Standard Deviation	Z-value	P-value	Adjusted odds ratio(95% CI)
	Gender
	Female	1	(reference)
	Male	0.63917	0.0283479	-10.09	＜0.001	0.585955	0.697217
	Age_group
	45~59 years old	1	(reference)
	60~74 years old	0.984099	0.0443436	-0.36	0.722	0.900914	1.07496
	75~89 years old	0.782541	0.0641211	-2.99	0.003	0.666438	0.91887
	90 years and above	0.141878	0.112711	-2.46	0.014	0.0299024	0.673173
	5 quintile of income
	Lowest-income group	1	(reference)
	Lower-middle-income	1.13284	0.0711152	1.99	0.047	1.00169	1.28116
	Middle-income group	1.12806	0.0639439	2.13	0.034	1.00944	1.26061
	Upper-middle-income group	0.903114	0.0450587	-2.04	0.041	0.818981	0.99589
	High income group	0.648154	0.0408936	-6.87	＜0.001	0.572761	0.73347
	Region
	Northeast region	1	(reference)
	Eastern region	0.82544	0.0593339	-2.67	0.008	0.716968	0.950323
	Central region	1.19002	0.0856083	2.42	0.016	1.03352	1.37021
	Western region	1.09841	0.0782062	1.32	0.187	0.955347	1.26291
	Marital Status
	Single	1	(reference)
	Married	0.784064	0.0396262	-4.81	＜0.001	0.710121	0.865707
	Medical Insurance
	Not participating in medical insurance	1	(reference)
	Not participating in medical insurance	1.06712	0.0914669	0.76	0.449	0.902094	1.26233
	Enterprise employee medical insurance	1.10391	0.0757968	1.44	0.15	0.964913	1.26293
	Public medical care	0.803374	0.147856	-1.19	0.234	0.560092	1.15233
	Highest Education(3 Catagory)
	Education-Primary and lower	1	(reference)
	Education-Secondary school	0.981763	0.0400927	-0.45	0.652	0.906245	1.06357
	Education-Junior college and above	1.1411	0.144333	1.04	0.297	0.89055	1.46214
	Hukou
	Rural	1	(reference)
	Urban	0.978007	0.0499732	-0.44	0.663	0.831078	1.00652
	Physical exercise
	Did not engage in physical exercise	1	(reference)
	Mild physical exercise	1.00978	0.0365174	0.27	0.788	0.924325	1.06365
	Moderate physical exercise	1.14229	0.099783	1.52	0.128	0.944066	1.32873
	Severe physical exercise	0.892785	0.115574	-0.88	0.381	0.684858	1.13597
	Smoking status
	Non-smoking	1	(reference)
	Smoking	0.998437	0.0453143	-0.03	0.861	0.913458	1.08408
	Alcohol consumption status
	Does not drink alcohol	1	(reference)
	Drinks alcohol - less than once a month	1.08505	0.0620695	1.32	0.154	0.969802	1.21399
	Drinks alcohol - more than once a month	0.901937	0.039469	-2.36	0.021	0.830559	0.98518
	Participate in social activities with friends and relatives
	No	1	(reference)
	Yes	1.15154	0.0410575	3.96	＜0.001	1.07382	1.23489
	Participates in recreational and leisure social activities
	No	1	(reference)
	Yes	0.8983	0.0390096	-2.13	0.033	0.839487	0.99258
	Participates in community activities
	No	1	(reference)
	Yes	0.979126	0.109939	-0.06	0.848	0.78922	1.21471
	WeChat usage
	Does not use Wechat	1	(reference)
	Uses WeChat	0.926804	0.095055	-0.51	0.608	0.760881	1.12891
	WeChat Moments posting
	Does not post on WeChat	1	(reference)
	Posts on WeChat Moments	1.02494	0.0591115	0.65	0.916936	0.916936	1.14914
	Sleep duration (in minutes)
	If sleep time < 420min	1	(reference)
	If sleep time > 420min	0.5964	0.0470961	-2.31	0.021	0.796644	0.981592

## Sheet: table6
	Table 6: Univariate and multivariate associations with depressive symptoms	Table #: Descriptive Statistics (N = 15935)	Table #: Descriptive Statistics (N = 15935)			Table #: Descriptive Statistics (N = 15935)
			Univariate analysis					Multivariate analysis
		Healthy	Depression					Depression
		n	n		%	P-value		Adjusted odds ratio (95% CI)			P-value
	Total
		8757	7178		45.05
	Gender
	Female	3910	4347		52.65	<0.001		1
	Male	4847	2831		36.87			0.639504	0.579318	0.686967	<0.001
	Age group
	45~59 years old	4241	3371		44.44	0.008		1
	60~74 years old	3804	3268		46.21			0.980984	0.900429	1.06875	0.661
	75~89 years old	730	537		42.38			0.788965	0.681124	0.91388	0.002
	90 years and above	9	2		18.18			0.157705	0.0346534	0.717702	0.017
	5 quintile of income
	Lowest-income group	2298	2155		48.39	<0.001		1
	Lowest-middle-income group	950	1076		53.11			1.1415	1.01131	1.28845	0.032
	Middle-income group	1427	1430		50.05			1.13905	1.0171	1.2675	0.024
	Upper-middle-income group	1857	1422		43.37			0.894198	0.81092	0.984296	0.023
	High income group	2225	1095		32.98			0.642139	0.56888	0.727084	<0.001
	Region
	Northeast region	597	470		44.05	<0.001		1
	Eastern region	3034	1894		38.43			0.795426	0.691235	0.914552	<0.001
	Central region	2400	2289		48.82			1.17412	1.02029	1.34929	0.024
	Western region	2726	2525		48.09			1.09822	0.956954	1.26035	0.182
	Marital Status
	Single	1051	1181		52.91	<0.001		1
	Married	7706	5997		43.76			0.7768	0.704315	0.856839	<0.001
	Medical Insurance
	Not participating in medical insurance	352	319		47.54	<0.001		1
	Residential medical insurance	6829	5969		46.62			0.946846	0.803305	1.00603	0.515
	Enterprise employee medical insurance	1451	850		36.94			1.00769	0.821665	1.23582	0.941
	Public medical care	125	45		26.47			0.7542	0.50845	1.11873	0.161
	Highest Education(3 Catagory)
	Education-Primary and lower	5164	4776		48.05	<0.001		1
	Education-Secondary school	3360	2268		40.3			0.959095	0.886029	1.03819	0.302
	Education-Junior college and above	233	134		36.51			1.13836	0.88839	1.45867	0.306
	Hukou-Household register
	Rural	6266	5520		46.84	<0.001		1
	Urban	2491	1658		39.36			1.09267	0.993258	1.20204	0.069
	Physical exercise
	Did not engage in physical exercise	4779	3976		45.41	0.274		1
	Mild physical exercise	3513	2797		44.33			0.990444	0.923323	1.06244	0.789
	Moderate physical exercise	326	298		47.76			1.12464	0.94406	1.33407	0.178
	Severe physical exercise	139	107		43.5			0.888973	0.684858	1.1456	0.363
	Smoking status
	Non-smoking	6156	5568		47.49	<0.001		1
	Smoking	2601	1610		38.23			0.988993	0.905178	1.07773	0.861
	Alcohol consumption status
	Does not drink alcohol	5136	4797		48.29	<0.001		1
	Drinks alcohol - less than once a month	861	720		45.54			1.08505	0.971804	1.21551	0.156
	Drinks alcohol - more than once a month	2760	1661		37.57			0.909914	0.836282	0.990029	0.023
	Participate in social activities with friends and relatives
	No	5388	4276		44.25	<0.001		1
	Yes	3369	2902		46.28			1.14708	1.07114	1.22842	<0.001
	Participates in recreational and leisure social activities
	No	6809	5721		45.66	<0.001		1
	Yes	1948	1457		42.79			0.8983	0.827074	0.974055	0.012
	Participates in community activities
	No	8506	7004		45.16	0.085		1
	Yes	251	174		40.94			0.979126	0.78922	1.21471	0.848
	Internet usage status
	Does not use Internet	4749	4186		46.85	<0.001		1
	Internet users	4008	2992		42.74			1.26309	0.903765	1.76528	0.171
	WeChat usage
	Does not use WeChat	329	296		47.36	<0.001		1
	Uses WeChat	3679	2696		42.29			0.926964	0.827409	1.01698	0.101
	WeChat Moments posting
	Does not post on WeChat	1459	1149		44.06	<0.001		1
	Posts on WeChat Moments	2220	1547		41.07			1.02649	0.916936	1.14914	0.65
	Sleep duration (in minutes)	422.5±117.0	380.3±129.0			<0.001*
	If sleep time < 420min	4884	4951		50.34	<0.001		1
	If sleep time > 420min	3873	2227		36.51			0.5967	0.557911	0.638266	<0.001
	*t-test
