# Supplementary material for: Depression Risk Among Chinese Middle-Aged and Older Adults Based on CHARLS 2020 Survey Data
Source: Research Square preprint supplement (doi:10.21203/rs.3.rs-7354422/v1), 2025-10-06
Supplement: Supplementary file 2 [file 7b2a38527c03c84e629b0fcf.xlsx]

## Sheet: Sheet1
Annex 1:Modified Poisson Regression
Depression	Incidence Rate Ratio	SE	Z-value	P-value	95% Confidence Interval
Gender
Female	1	(reference)
Male	0.789755	0.0187326	-7.23	< 0.001	0.740789	0.841958
Age_group
45~59 years old	1	(reference)
60~74 years old	0.989318	0.0321253	-0.33	0.741	0.928315	1.05433
75~89 years old	0.88131	0.0510875	-2.18	0.029	0.786659	0.98735
90 years and above	0.308277	0.218435	-1.66	0.097	0.0768789	1.23616
5 quintile of income
Lowest-income group	1	(reference)
Lower-middle-income	1.05818	0.0446976	1.34	0.181	0.974107	1.14952
Middle-income group	1.06344	0.0418236	1.56	0.118	0.98455	1.14866
Upper-middle-income group	0.950462	0.0343112	-1.41	0.159	0.885537	1.02015
High income group	0.770823	0.0375917	-5.34	< 0.001	0.700556	0.848138
Region
Single	1	(reference)
Eastern region	0.896776	0.0473546	-2.06	0.039	0.808604	0.994562
Central region	1.08863	0.0566161	1.63	0.103	0.983131	1.20545
Western region	1.04556	0.0539548	0.86	0.388	0.944983	1.15684
Marital Status
Single	1	(reference)
Married	0.892302	0.0302173	-3.36	0.001	0.835	0.953537
Medical Insurance
Residential medical insurance	1.02919	0.0598166	0.5	0.621	0.918385	1.15337
Enterprise employee medical insurance	1.05981	0.055301	1.11	0.266	0.956783	1.17394
Public medical care	0.844122	0.132996	-1.08	0.282	0.619861	1.14952
Highest Education
Education-Primary and lower	1	(reference)
Education-Secondary school	0.992572	0.0297257	-0.25	0.803	0.935988	1.05258
Education-Junior college and above	1.08139	0.105662	0.8	0.423	0.892923	1.30965
Hukou
Urban	1	(reference)
Rural	0.957091	0.0370282	-0.23	0.821	0.92159	1.06687
Physical exercise
Did not engage in physical exercise	1	(reference)
Mild physical exercise	1.00588	0.025941	0.23	0.82	0.956303	1.05803
Moderate physical exercise	1.06872	0.0647341	1.1	0.273	0.949089	1.20344
Severe physical exercise	0.94301	0.0926897	-0.6	0.551	0.777769	1.14336
Smoking status
Non-smoking	1	(reference)
Smoking	1.00063	0.0343095	0.02	0.985	0.935597	1.07019
Alcohol consumption status
Does not drink alcohol	1	(reference)
Drinks alcohol - less than once a month	1.03938	0.0426725	0.94	0.347	0.959016	1.12647
Drinks alcohol - more than once a month	0.941517	0.0306418	-1.85	0.064	0.883335	1.00353
Participate in social activities with friends and relatives
No	1	(reference)
Yes	1.073	0.0270813	2.79	0.005	1.02122	1.12742
Participates in recreational and leisure social activities
No	1	(reference)
Yes	0.956024	0.0295908	-1.45	0.146	0.899751	1.01582
Participates in community activities
No	1	(reference)
Yes	0.998766	0.0806896	-0.02	0.988	0.852502	1.17012
Participates in volunteer/charity activities
No	1	(reference)
Yes	1.10408	0.0743782	1.47	0.142	0.967512	1.25992
Internet usage status
Does not use the internet	1	(reference)
Chats online	0.967001	0.0383154	-0.85	0.397	0.894746	1.04509
WeChat usage
Does not use the internet	1	(reference)
Uses WeChat	0.974816	0.0685431	-0.36	0.717	0.84932	1.11885
WeChat Moments posting
Does not post on WeChat	1	(reference)
Posts on WeChat Moments	1.01194	0.0424404	0.28	0.777	0.932084	1.09864
Sleep duration (in minutes)
If sleep time < 420min	1	(reference)
If sleep time > 420min	0.905196	0.034375	-2.62	0.009	0.840268	0.97514
